# Supplementary material
Source: MDPI journal article supplement (https://www.mdpi.com/2073-4395/13/1/128)
Supplement: s1 [file s1]

## Figure 2D

```
library(RColorBrewer)
library(dplyr)
library(graphics)
install.packages("plotrix")#pie3D
library(plotrix)
df <- data.frame(value = c(20.15,14.67,12.30,11.70,9.92,8.89,7.11,6.81,5.63,2.67,0.15),
                  group = c('Lipids',
                            'Others',
                            'Amino acids and derivatives',
                            'Phenolic acids',
                            'Organic acids',
                            'Nucleotides and derivatives',
                            'Flavonoids',
                            'Alkaloids',
                            'Terpenoids',
                            'Lignins and Coumarins',
                            'Tannins'))

df <- arrange(df,value)
labs <- paste0(round(df$value/sum(df$value)*100,2), "%")
#mycolors<- brewer.pal(11,"Set3")
pie(df$value,labels=labs, init.angle=90,
    col = c("#8DD3C8",
            "#FEFFB3",
            "#BEBBDA",
            "#FB8071",
            "#80B1D2",
            "#FDB062",
            "#B3DE6A",
            "#FDCDE5",
            "#D9D9D9",
            "#BC80BC",
            "#CCEAC4"),
    border="white",
    edges = 10000)
#explode=0.1)
group = c('Amino acids and derivatives',
          'Phenolic acids',
          'Flavonoids',
          'Lignins and Coumarins',
          'Nucleotides and derivatives',
          'Alkaloids',
          'Terpenoids',
          'Organic acids',
```

```

'Lipids',
'Tannins',
'Others')
legend("topright", group, cex=1.5, fill=c("#8DD3C8",
                                           "#FEFFB3",
                                           "#BEBBDA",
                                           "#FB8071",
                                           "#80B1D2",
                                           "#FDB062",
                                           "#B3DE6A",
                                           "#FDCDE5",
                                           "#D9D9D9",
                                           "#BC80BC",
                                           "#CCEAC4"),border = NA)

zz <- data.frame(value = c(44.73,0,55.26),
                  group = c('down','up','insignificnat'))
zz <-arrange(zz,value)
labs <- paste0(round(zz$value/sum(zz$value)*100,2), "%")

```

### Figure 3B

```

library(ggplot2)
library(ggrepel)
df2=read.csv("d:/R/df2.csv",sep=',',header=T)
df2[which(df2$VIP >= 1 & df2$logFC <= -1), 'sig'] <- 'Down'
df2[which(df2$VIP >= 1 & df2$logFC >= 1), 'sig'] <- 'Up'
df2[which(df2$VIP <= 1 | abs(df2$logFC) < 1), 'sig'] <- 'insignificant'
p <- ggplot(df2, aes(x = logFC, y = VIP, color = sig)) +
  geom_point(size = 2) +
  scale_colour_manual(values = c('red2', 'blue2', 'gray'), limits = c('Up', 'Down', 'insignificant'))
+
  theme(panel.grid = element_blank(), panel.background = element_rect(color = 'black', fill =
'transparent'), plot.title = element_text(hjust = 0.5)) +
  theme(legend.key = element_rect(fill = 'transparent'), legend.background = element_rect(fill =
'transparent'), legend.position = c(0.9, 0.93)) +
  geom_vline(xintercept = c(-1, 1), color = 'gray', size = 0.3) +
  geom_hline(yintercept = 1, color = 'gray', size = 0.3) +
  xlim(-18, 25) + ylim(0, 2) +
  labs(x = "\nLog2 Fold Change", y = 'Variable Importance in Projection(VIP)\n', color = "")+
  scale_x_continuous(breaks=seq(-18,25,6))

```

P

### Figure 3C

```
pie(zz$value,labels=labs, init.angle=90,
    col = c("blue2",
            "red2",
            "grey"),
    border="white",
    edges = 10000,
    radius=0.5)
#explode=0.1)
```

```
library(openxlsx)
```

### Figure 3D

```
KEGG=read.xlsx("d:/R/KEGG.xlsx",sep = '\t',check.names = F)
library(ggplot2)
KEGG1 <- ggplot(data = KEGG,mapping = aes(x = Rich_Factor,y = Kegg_pathway))+
  geom_point(aes(color= pvalue,size = Metabolite_number)) +
  scale_colour_gradient(high = 'green',low = 'red') +
  theme_bw()+
  labs(title = 'Statistics of KEGG Enrichment',
       x = 'Rich Factor',
       y = 'kegg pathways')+
  xlim(0.5,1)
KEGG1
```

### Figure S3

```
#pheatmap
install.packages("pheatmap")
library(pheatmap)
library(openxlsx)
df4=read.xlsx("d:/R/df4.xlsx",rowNames=T)
annotation_row = data.frame(Class=factor(
  rep(c("Arachidonic acid metabolism",
        "Linoleic acid metabolism",
        "Alpha-Linolenic acid metabolism",
        "Flavone and flavonol biosynthesis",
        "Phenylpropanoid biosynthesis"),
    c(5, 6, 5, 4, 7))))
row.names(annotation_row)
row.names(annotation_row)<-rownames(df4)
ann_colors = list(
  Class = c(`Arachidonic acid metabolism`="blue",
            `Linoleic acid metabolism`="green",
            `Alpha-Linolenic acid metabolism`="red",
```

```

        `Flavone and flavonol biosynthesis`="orange",
        `Phenylpropanoid biosynthesis`="black"))
pheatmap(df4,scale="row",
          cellheight = 10,cellwidth = 20,
          treeheight_row = 50,
          fontsize_col = 10,fontsize = 8,angle_col=45,
          border_color = "white",
          cluster_cols = F,cluster_rows = F,
          annotation_row = annotation_row,
          annotation_colors = ann_colors,
          color = colorRampPalette(c("blue", "white", "red"))(100))
row.names(df4)
colnames(df4)
pheatmap(df1,annotation_row = annotation_row,scale = "row")
pheatmap(df1, scale='row',annotation_row = annotation_row, annotation_col =
annotation_col,cluster_rows = FALSE, gaps_row = c(24, 38))

```
